# Supplementary material for: Super-assembled sandwich-like Au@MSN@Ag nanomatrices for high-throughput and efficient detection of small biomolecules
Source: Springer Nature journal article supplement (doi:10.1007/s12274-021-3741-0), 2021-08-12
Supplement: 12274_2021_3741_MOESM1_ESM.pdf [file 12274_2021_3741_MOESM1_ESM.pdf]

# Electronic Supplementary Material

## Super-assembled sandwich-like Au@MSN@Ag nanomatrices for high-throughput and efficient detection of small biomolecules

Dantong Zhao<sup>1,3,§</sup>, Chunxia Ma<sup>2,§</sup> (✉), Meng Gao<sup>2</sup>, Yong Li<sup>2</sup>, Bo Yang<sup>2</sup>, Hui Li<sup>1</sup>, Runhao Zhang<sup>2</sup>, Minglu Hao<sup>2</sup>, Jing Huang<sup>2</sup>, Kang Liang<sup>4</sup>, Pu Chen<sup>5</sup>, Lei Xie<sup>6</sup>, Rong Rong<sup>1</sup> (✉), and Biao Kong<sup>6</sup> (✉)

<sup>1</sup> College of Medicine, Shandong University of Traditional Chinese Medicine, Jinan 250355, China

<sup>2</sup> Shandong Analysis and Test Center, National Supercomputer Research Center of Advanced Materials, Advanced Materials Institute, Qilu University of Technology (Shandong Academy of Sciences), Jinan 250014, China

<sup>3</sup> Heze Institute for Food and Drug Control, Heze 274000, China

<sup>4</sup> School of Chemical Engineering and Graduate School of Biomedical Engineering, The University of New South Wales, NSW 2052, Australia

<sup>5</sup> Department of Chemical Engineering, University of Waterloo, Waterloo, Ontario, N2L 3G1, Canada

<sup>6</sup> Department of Chemistry, Shanghai Key Lab of Molecular Catalysis and Innovative Materials, iChEM, Fudan University, Shanghai 200032, China

<sup>§</sup>Dantong Zhao and Chunxia Ma contributed equally to this work

Supporting information to <https://doi.org/10.1007/s12274-021-3741-0>

### INFORMATION ABOUT ELECTRONIC SUPPLEMENTARY MATERIAL

#### Reagents and materials

Glucose, D-glucose-6-<sup>13</sup>C, Gly-<sup>15</sup>N, Ala-<sup>15</sup>N, sucrose, metabolites (guanine, glutamine, and inosine), flavone (kaempferol, puerarin, and quercetin), resveratrol, caffeine, fatty acids (C12:0, C16:0, C18:0, C20:0, C22:0), HAuCl<sub>4</sub>·3H<sub>2</sub>O, α-cyano-4-hydroxycinnamic (CHCA), 2,5-dihydroxybenzoic acid (DHB), triethanolamine (TEA), trifluoroacetic acid (TFA), polyvinylpyrrolidone (PVP, wt 40,000), trisodium citrate, cetyltrimethylammonium chloride (CTAC) solution (25 wt % in H<sub>2</sub>O) were purchased from Sigma-Aldrich (St. Louis, MO, USA). Tetraethyl orthosilicate (TEOS) and 1-octadecene were purchased from Aladdin Reagent (Shanghai, China). Methanol, ethanol, and acetonitrile, both HPLC-grade, were purchased from Merck (Darmstadt, Germany). Amino acids (Gly, Ala, Val, Hyp, Ile, Leu, Thr, Lys, Glu, His, Phe, Arg, Tyr, Cys, Try, Ser, Pro), four polypeptides (including donkey derived peptide A1, donkey derived peptide A2, horse derived peptide A, and bovine derived peptide A1), four ginsenosides (including Rg1, Re, Rb1, and Notoginsenoside R1), and Ginkgo leaf total lactones reference extract were obtained from NIFDC (Beijing, China). Other chemicals and reagents were all analytical grade and provided by MACKLIN (Shanghai, China). All reagents were used without purification. Ultrapure water was produced by a Milli-Q Gradient water system (Millipore, MA, USA).

#### Material characterization and measurements

The images of TEM and HRTEM, including elemental mapping images, were recorded on an FEI Talos<sup>TM</sup> F200s instrument (Thermo Fisher Scientific Inc., USA) microscope operated at 200 kV. The materials' water suspension was deposited on a copper grid before observation. EDX spectra and SEM images were obtained on SUPRATM 55 instrument (ZEISS, Japan) by dropping the materials suspensions on the aluminum foil. Dynamic light scattering (DLS) size and Zeta potential was measured by a Nano-ZS90 instrument (Malvern, Worcestershire, UK) in the water at 25°C. To obtain porosity information of materials, Nitrogen adsorption isotherms were measured with a Kubo X1000 (Bjbuilder, China) system at 77 K and the samples were degassed before measurement. Absorption spectra of Ultraviolet-visible light (UV-vis) were collected using a UV-2700 spectrophotometer (Shimadzu, Japan) at a wavelength of 250-700 nm in room temperature. The crystal structures of the materials were obtained by X-ray diffraction (XRD) by EMPYREAN (PANalytical, Holland) using Cu Kα radiation (λ = 1.54056) in the 2θ range of 10°-80°. Fourier transform infrared (FTIR) spectra were recorded by the KBr method on a VERTEX 70 FTIR instrument (Bruker, Germany). The thermogravimetric analysis (TGA) were detected by a STA 449F3 simultaneous TG/DSC analyzer (Netzsch, Germany) in the range of 30°C to 600°C. Inductively coupled plasma optical emission spectrometry (ICP-OES) were obtained by an IRIS Advantage instrument (Thermo Fisher Scientific Inc., USA).

Address correspondence to Chunxia Ma, [machunxia8927@163.com](mailto:machunxia8927@163.com); Rong Rong, [rosierong@163.com](mailto:rosierong@163.com); Biao Kong, [bkong@fudan.edu.cn](mailto:bkong@fudan.edu.cn)

## Supporting Figures

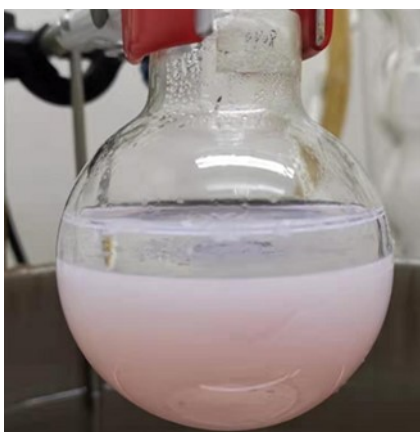

**Figure S1** The photo picture of the reactor for the synthesis of the Au@MSN by the biphasic stratification approach. The heterogeneous oil-water stratification reaction system shown in the figure contains the tetraethyl orthosilicate (TEOS) solution as a silica source in hydrophobic organic solvent as the upper oil phase, while the lower pink phase is the solution of the products, which contains monodisperse gold suspensions as core, cetyltrimethylammonium chloride (CTAC) as a template, and triethanolamine (TEA) as a catalyst.

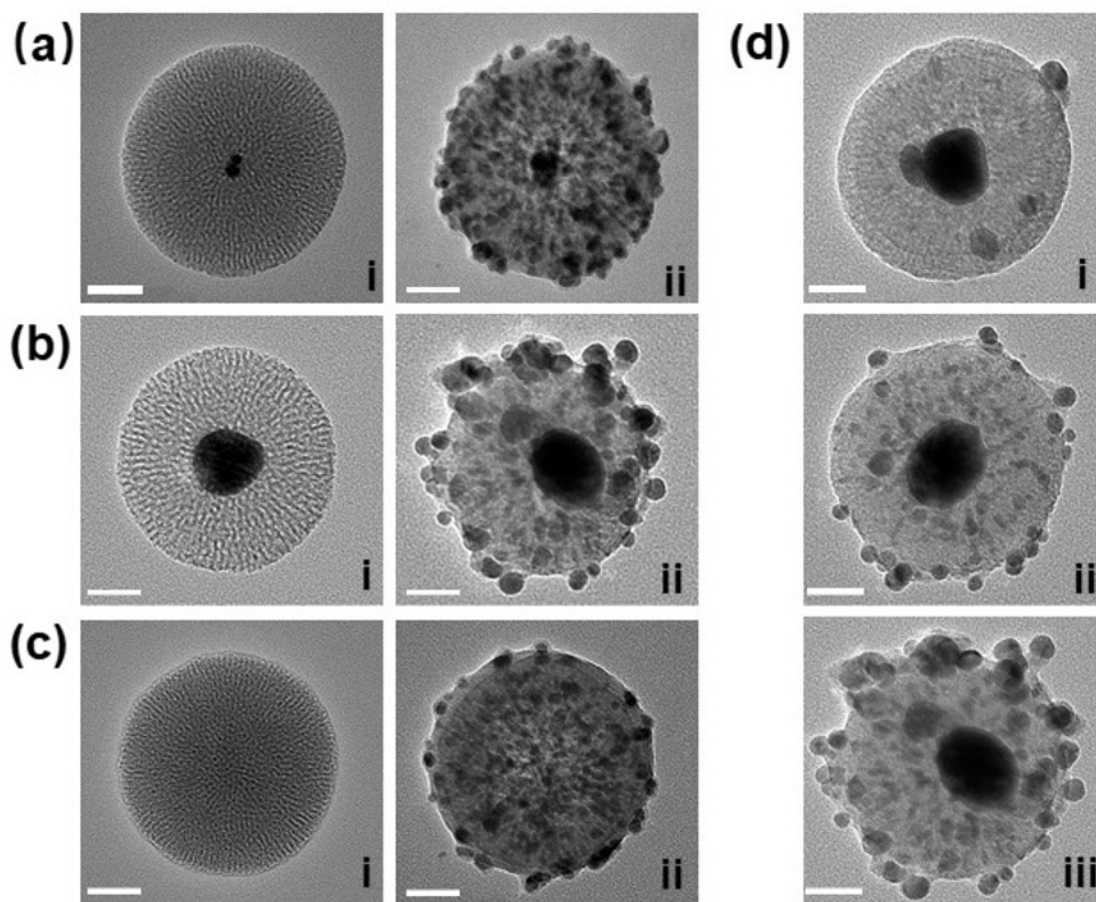

**Figure S2** Control and optimization of core-shell nanospheres for LDI MS Analysis: TEM images with (a) 15 nm AuNPs as core and (b) 45 nm AuNPs as core of the (i) Au@MSN, (ii) Au@MSN@Ag. (c) TEM images of (i) MSN and (ii) MSN@Ag. (d) TEM images of Au@MSN@Ag by silver mirror reaction at (i) once, (ii) twice, and (iii) three times. Scale bars, 50 nm.

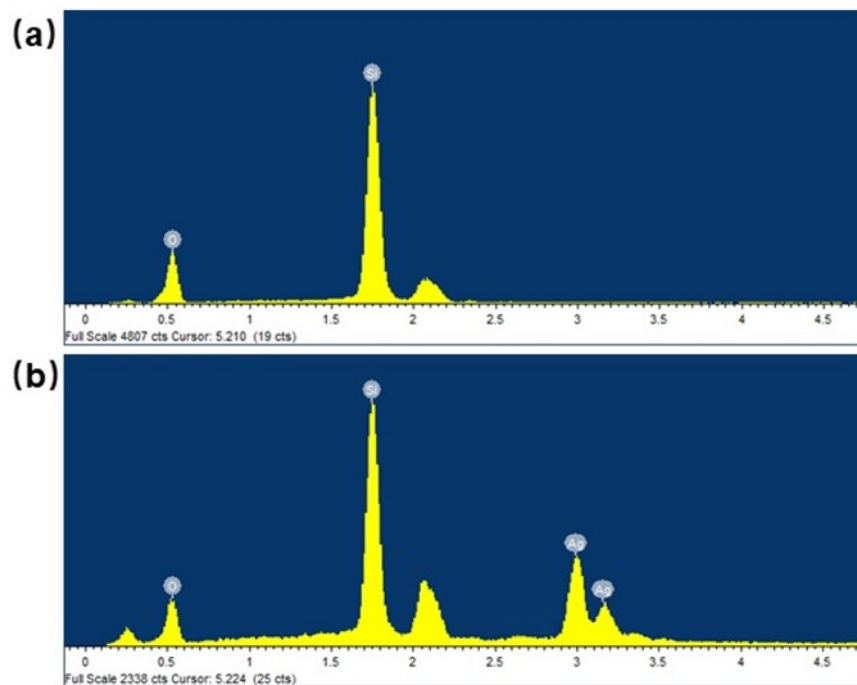

Figure S3 Typical EDX spectra for nanospheres. (a) Au@MSN. (b) Au@MSN@Ag.

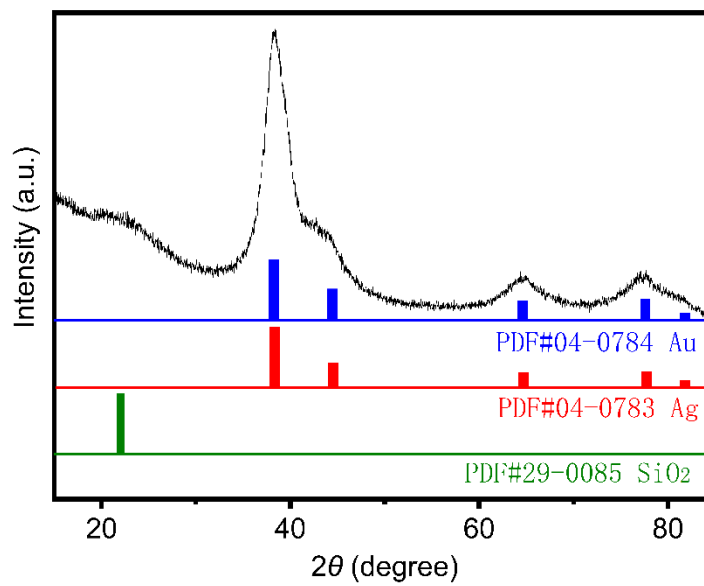

Figure S4 Typical XRD pattern of the sandwich-like Au@MSN@Ag nanospheres.

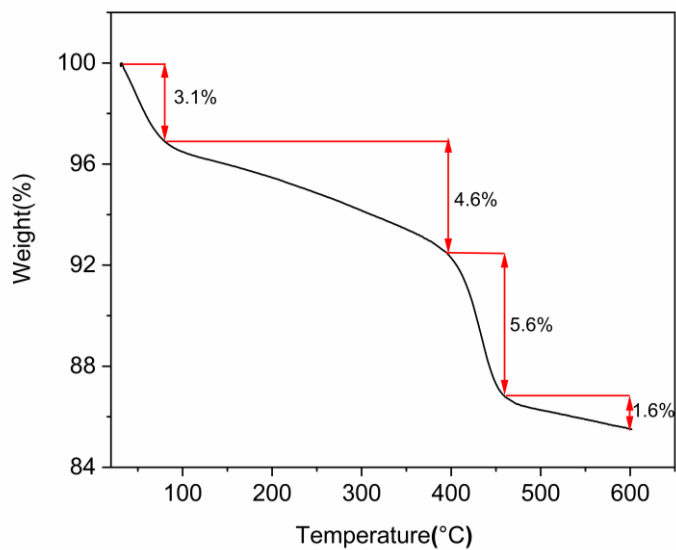

Figure S5 TGA curves of the sandwich-like Au@MSN@Ag nanospheres.

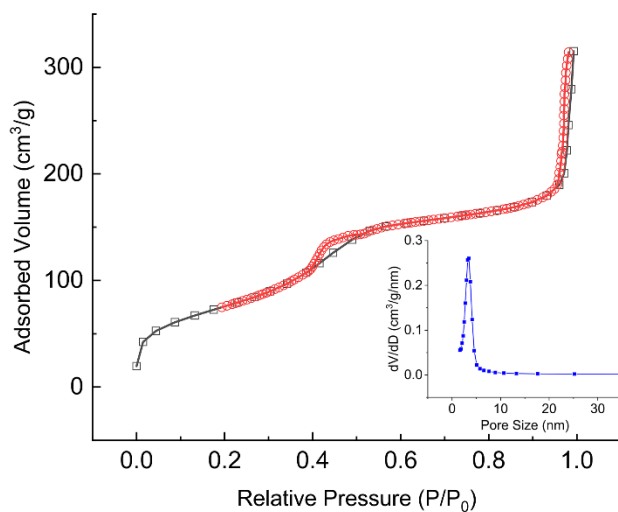

Figure S6 Nitrogen adsorption-desorption isotherms and pore size distribution (inset) of Au@MSN@Ag.

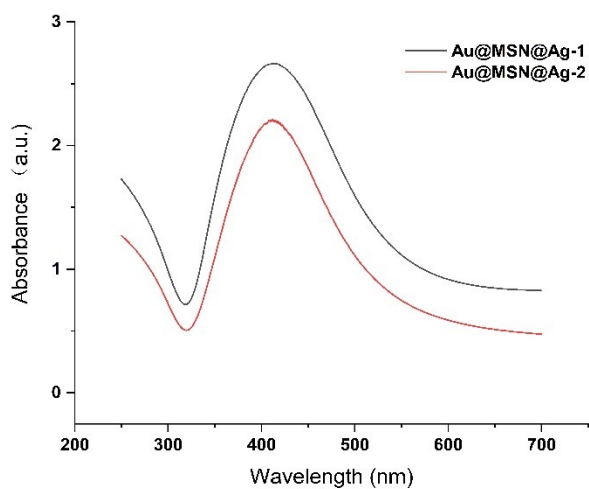

Figure S7 UV-Vis absorption spectra of Au@MSN@Ag-1 with 45 nm AuNPs as core and 55 nm MSN as shell, and Au@MSN@Ag-2 with 15 nm AuNPs as core and 100 nm MSN as shell. The thickness of the silver shell was the same. The nanospheres solutions concentration was 0.02 mg mL<sup>-1</sup>.

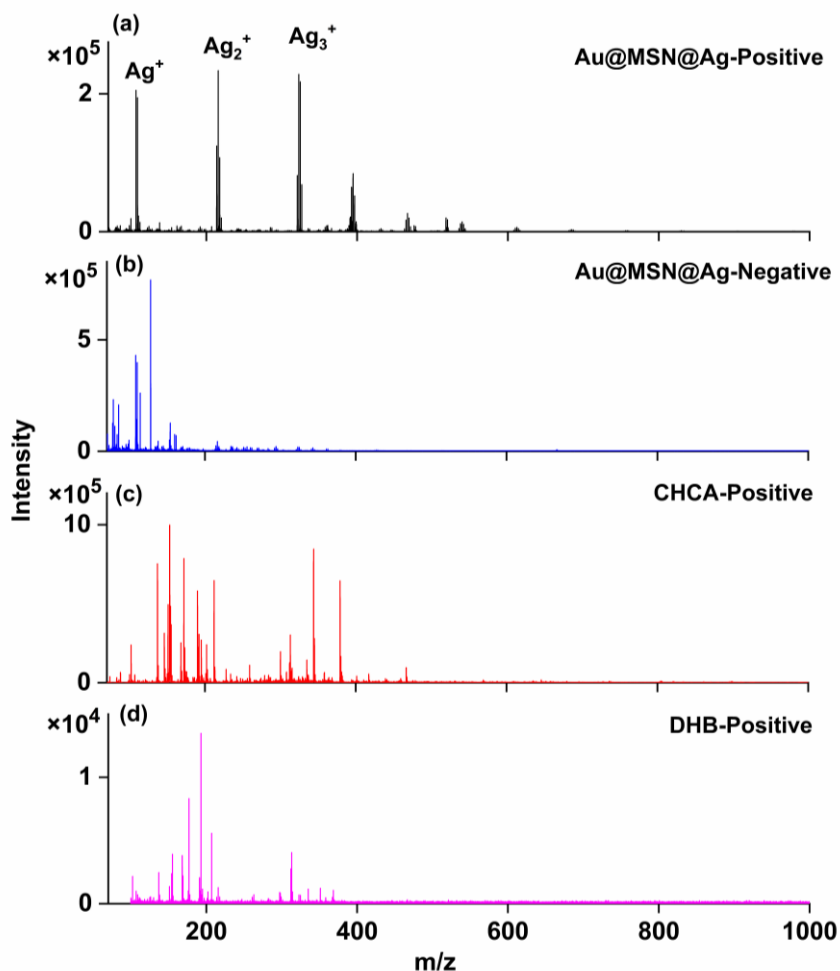

**Figure S8** LDI-TOF MS spectra detected in the positive-ion mode only using (a) Au@MSN@Ag, (c) CHCA, (d) DHB, and negative-ion mode only using (b) Au@MSN@Ag as the matrices.

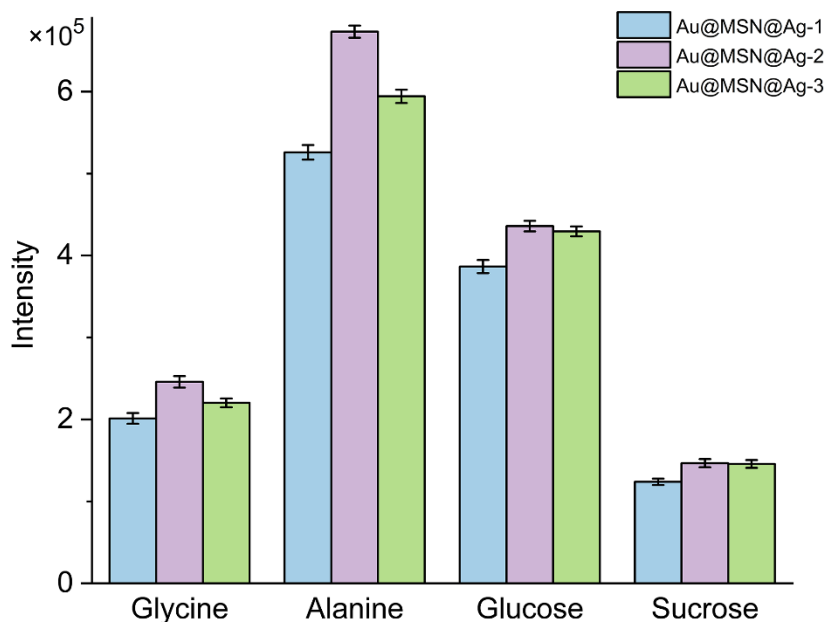

**Figure S9** Selection of optimized Au@MSN@Ag. The mean intensities ( $n=3$ ) of  $[M+^{107}\text{Ag}]^+$  signals of small molecules obtained using Au@MSN@Ag-1 (with 15 nm AuNPs as core and 100 nm MSN as shell), Au@MSN@Ag-2 (with 45 nm AuNPs as core and 55 nm MSN as shell) and Au@MSN@Ag-3 (with 45 nm AuNPs as core and 70 nm MSN as shell) as matrices.

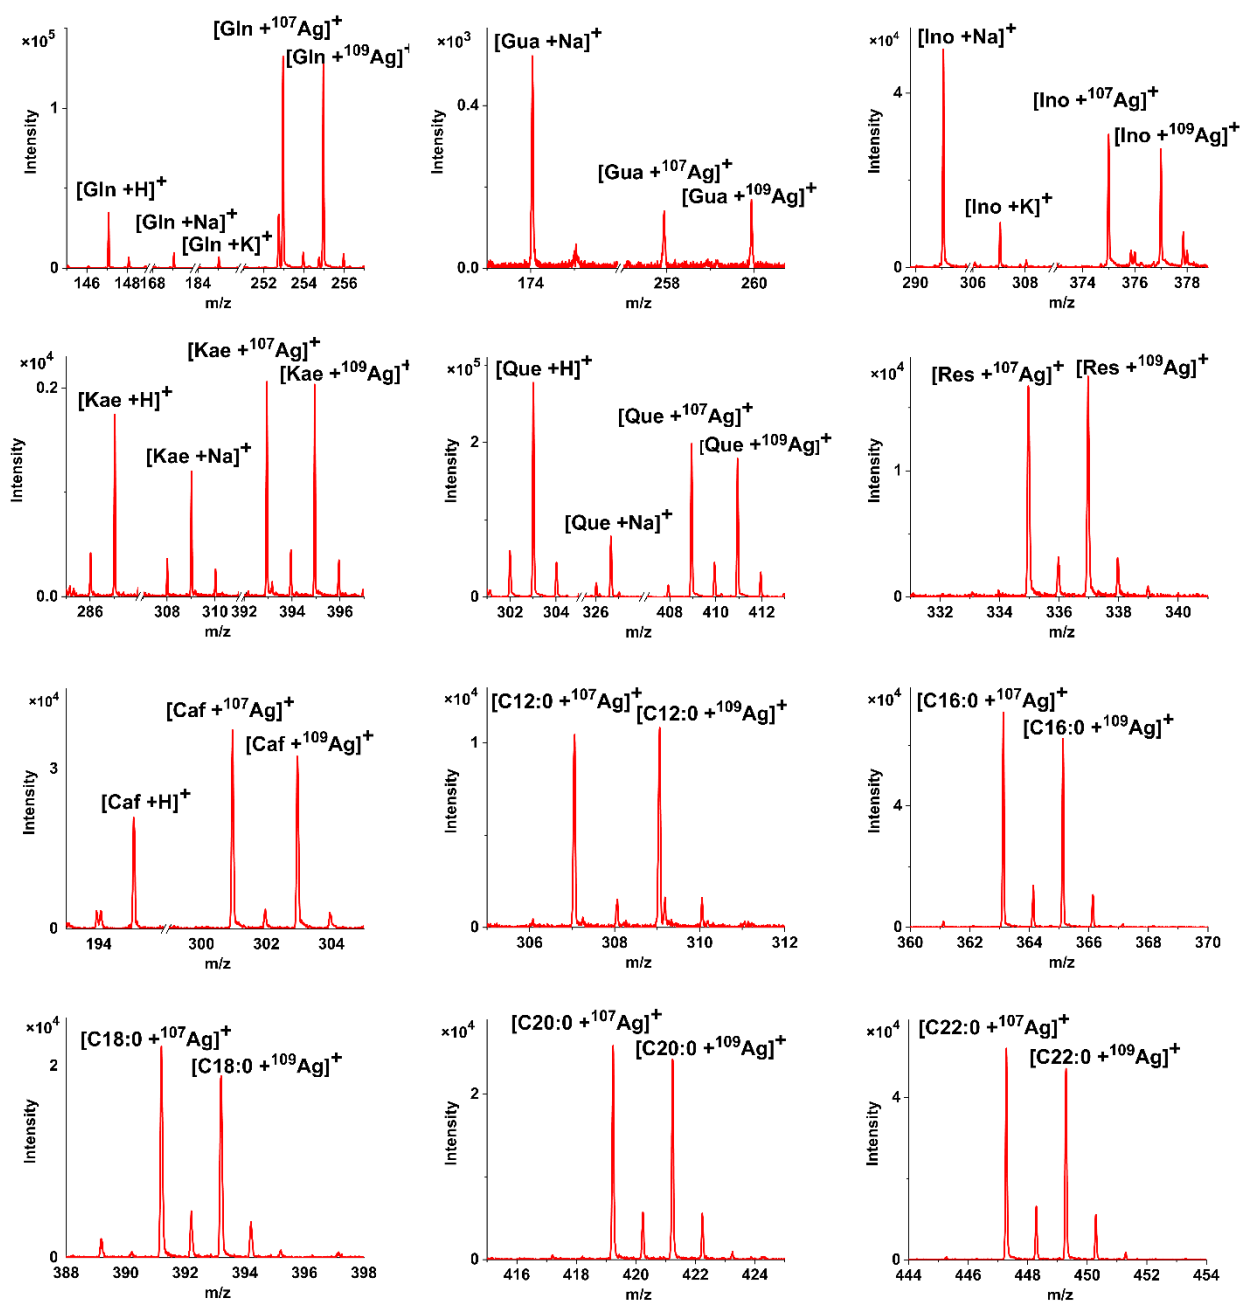

**Figure S10** Mass spectra of metabolites (guanine, inosine, and glutamine), flavone (kaempferol and quercetin), non-flavonoid polyphenols (resveratrol), caffeine, and fatty acids (C12:0, C16:0, C18:0, C20:0, C22:0) standards detected in positive ion mode using Au@MSN@Ag as the matrix by LDI MS. The amount of each analyte is 100  $\mu\text{g mL}^{-1}$ .

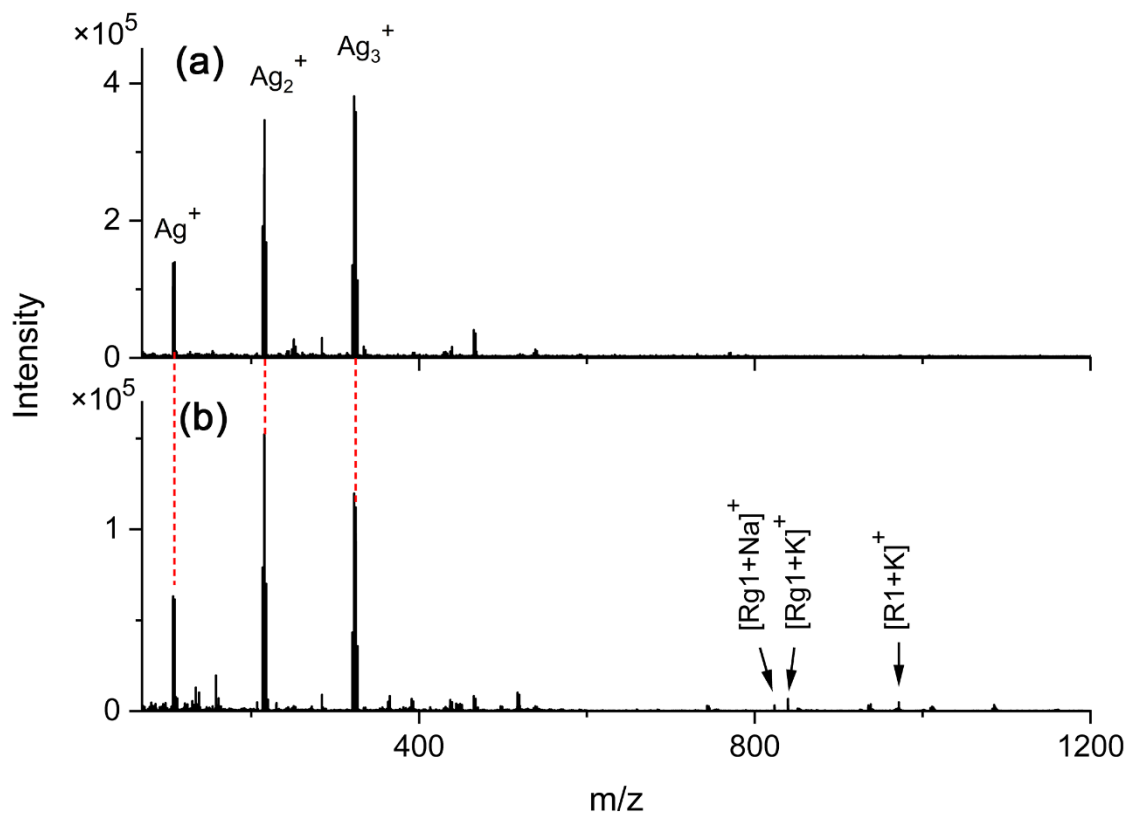

**Figure S11** Mass spectra of (a) polypeptide (donkey derived peptide A1, donkey derived peptide A2, horse derived peptide A, and bovine derived peptide A1), and (b) ginsenoside (Rg1, Re, Rb1, and Notoginsenoside R1) standards detected in positive ion mode using Au@MSN@Ag as the matrix by LDI MS. The amount of each analyte is  $100 \mu\text{g mL}^{-1}$ .

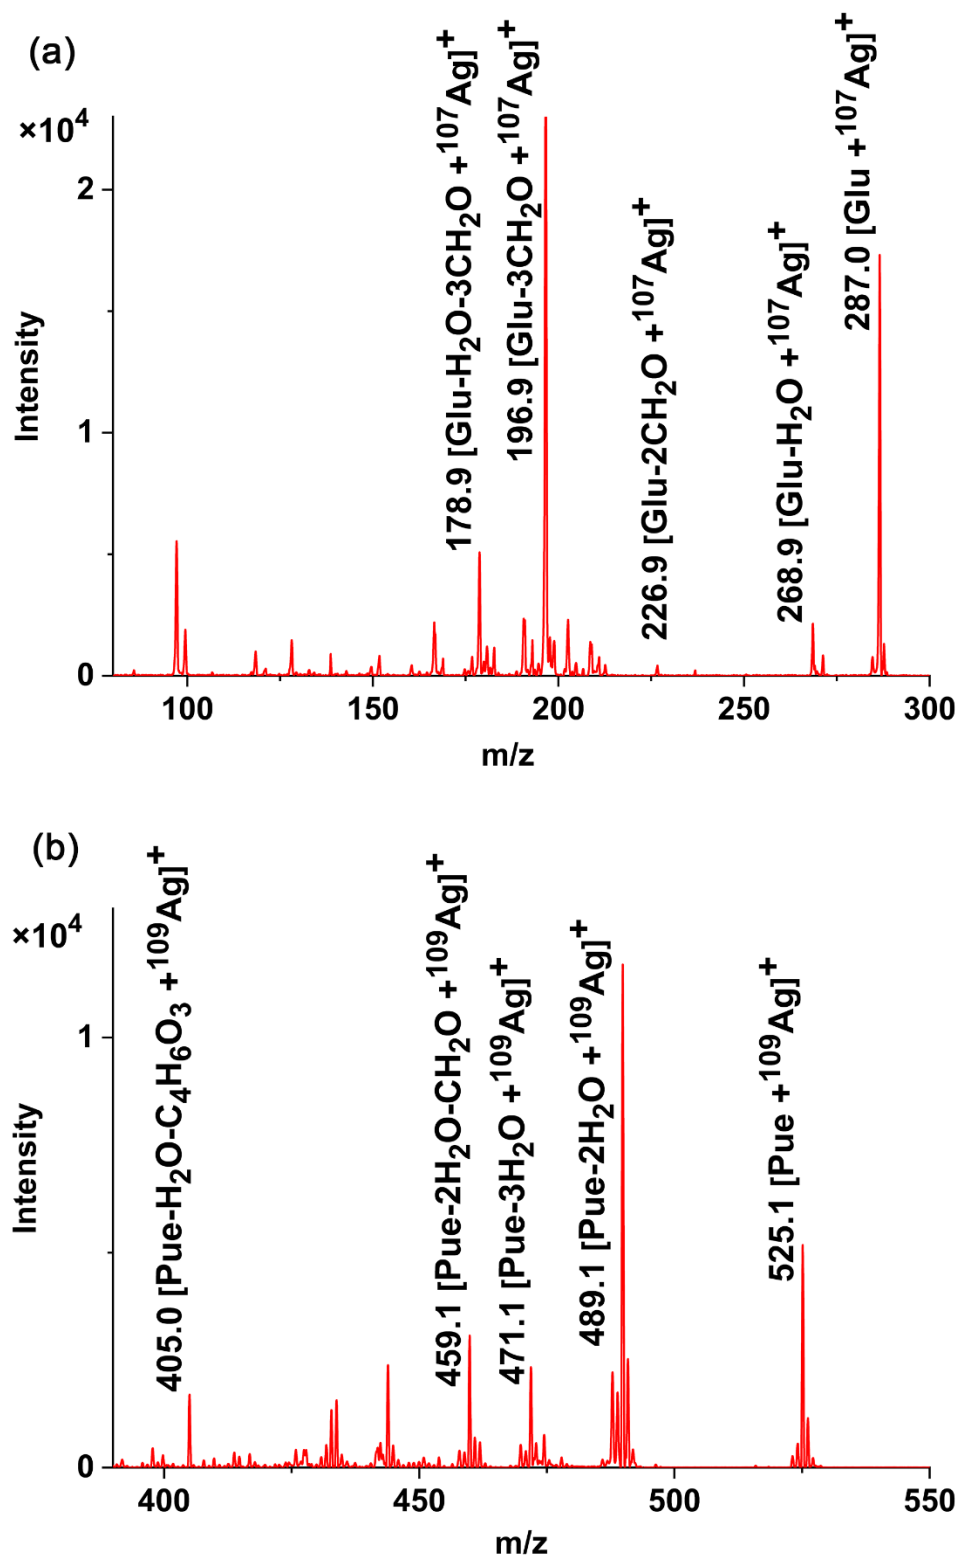

Figure S12 Tandem mass spectra of silver adducted of (a) glucose at  $m/z$  of 287.0 for  $[M+^{107}Ag]^+$ , and (b) puerarin at  $m/z$  of 525.1 for  $[M+^{109}Ag]^+$ .



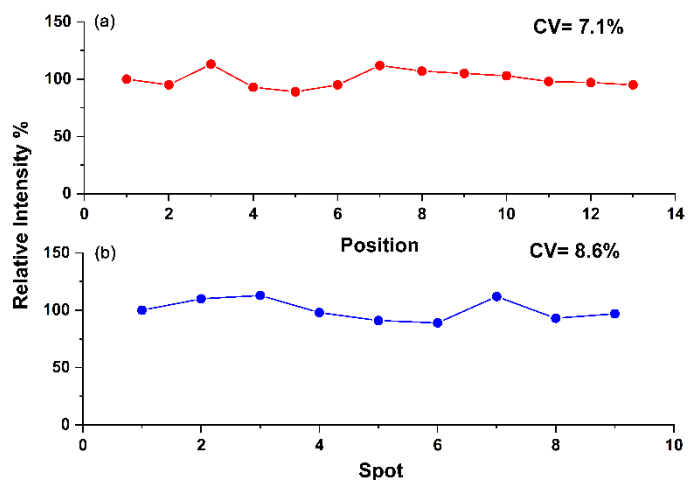

**Figure S13** Highly reproducible MS signal intensity by using the Au@MSN@Ag matrix. Analyte: Glucose. (a) 13 different positions in a single spot. (b) 9 different spots in the 3×3 array. The coefficient of variation (CV) values was 7.1% in the position-to-position (a) tests and 8.6% in the spot-to-spot (b) tests.

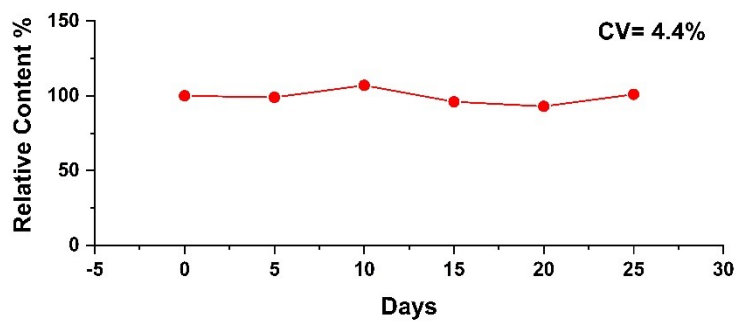

**Figure S14** The internal standard quantitative stability of LDI-MS in the 25 days period by using the Au@MSN@Ag matrix. Analyte: Glucose. The coefficient of variation (CV) value was 4.4%.

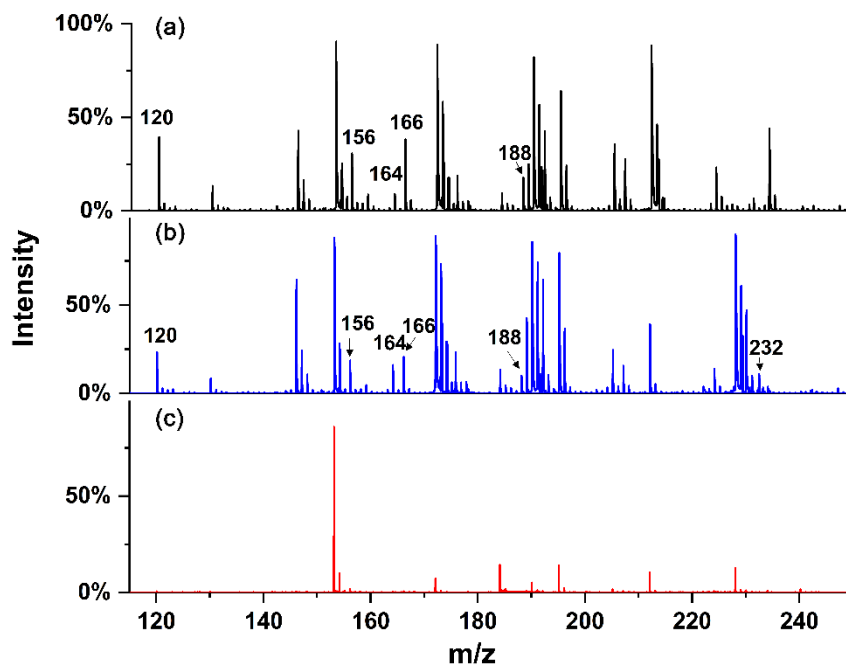

**Figure S15** Mass spectra of mixed amino acids solution containing Threonine ( $m/z = 120.1$  [M+H]<sup>+</sup>,  $m/z = 164.0$  [M+2Na-H]<sup>+</sup>), Tryptophan (not detect), Histidine ( $m/z = 156.1$  [M+H]<sup>+</sup>,  $m/z = 232.3$  [M+2K-H]<sup>+</sup>), and Phenylalanine ( $m/z = 166.1$  [M+H]<sup>+</sup>,  $m/z = 188.1$  [M+Na]<sup>+</sup>) obtained using saturated CHCA solution as matrixes. The samples were prepared in 0.5 M NaCl (a), 0.5 M KCl (b), and 5 mg mL<sup>-1</sup> BSA (c). The amount of each analyte is 500 pmol.

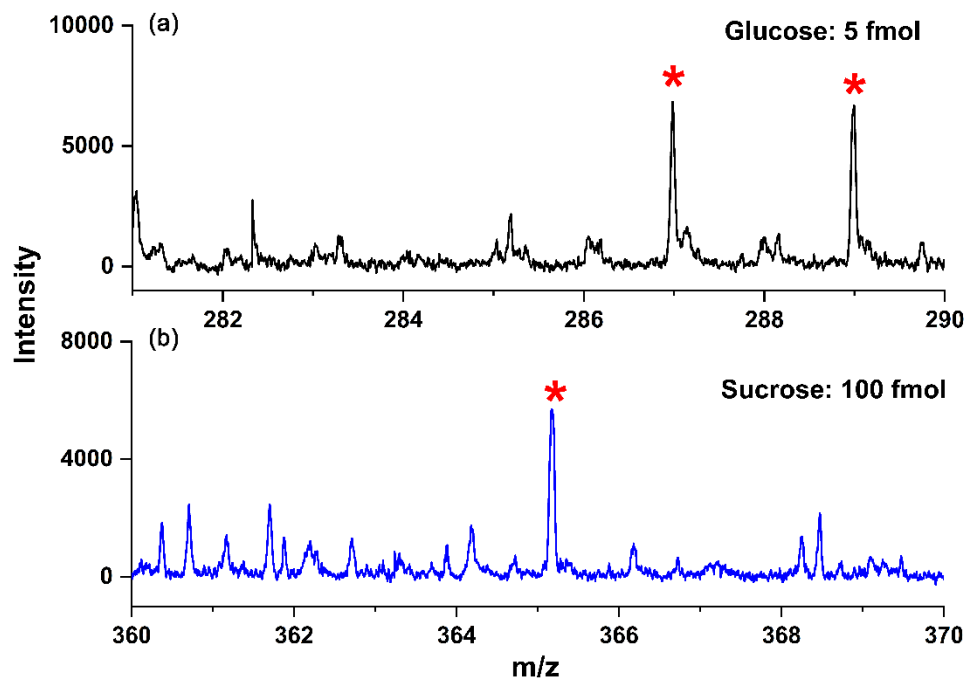

Figure S16 The LODs of glucose (a) and sucrose (b) using the Au@MSN@Ag as matrix.

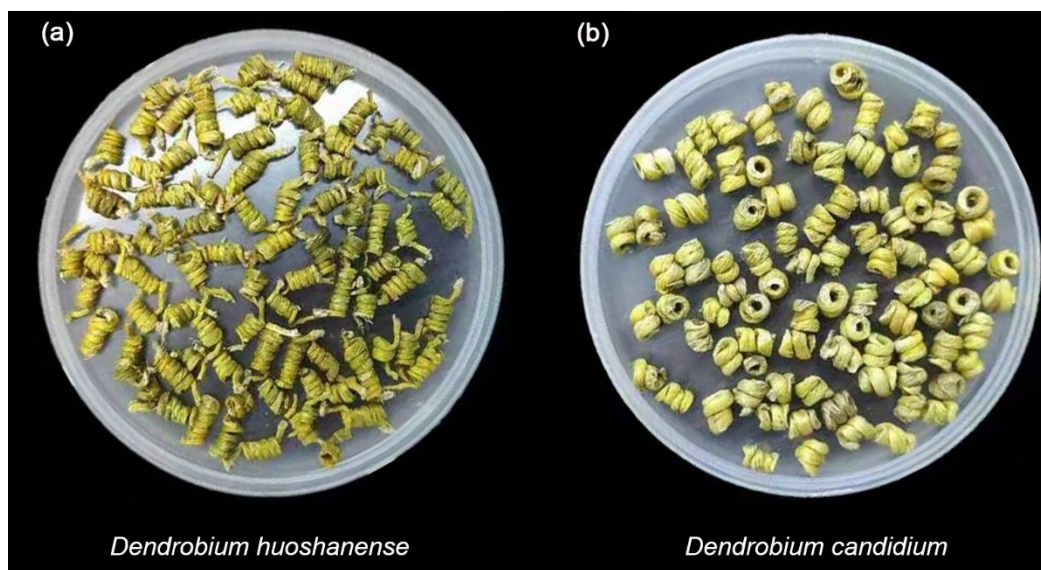

Figure S17 Photos of Medicinal *DENDROBIUM*. (a) *DENDROBIUM HUOSHANENSE* and (b) *DENDROBIUM CANDIDUM*.

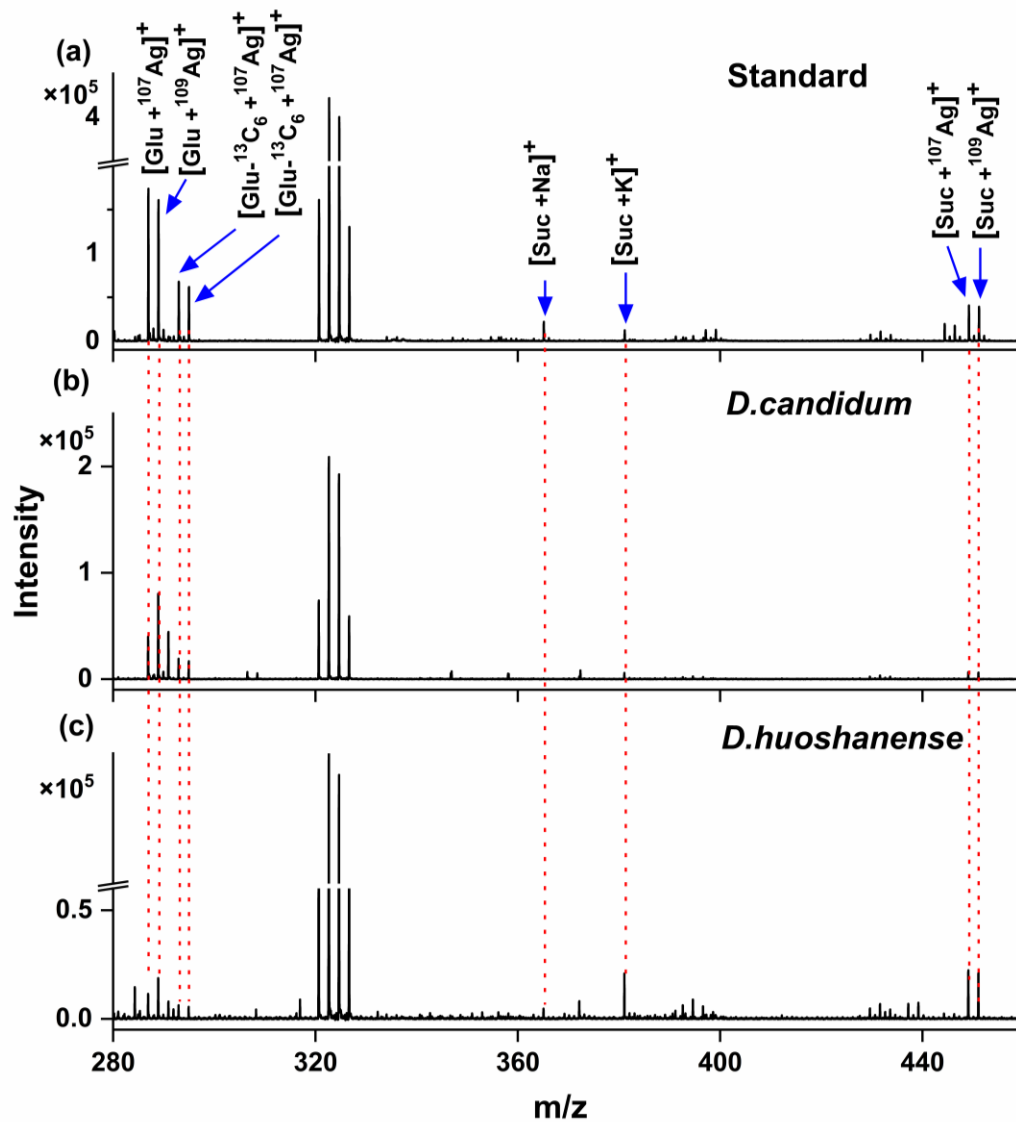

**Figure S18** LDI-MS spectra of (a) glucose and sucrose standard solution, (b) *D. CANDIDUM* extract solution, and (c) *D. HUOSHANENSE* extract solution with Au@MSN@Ag as matrix.

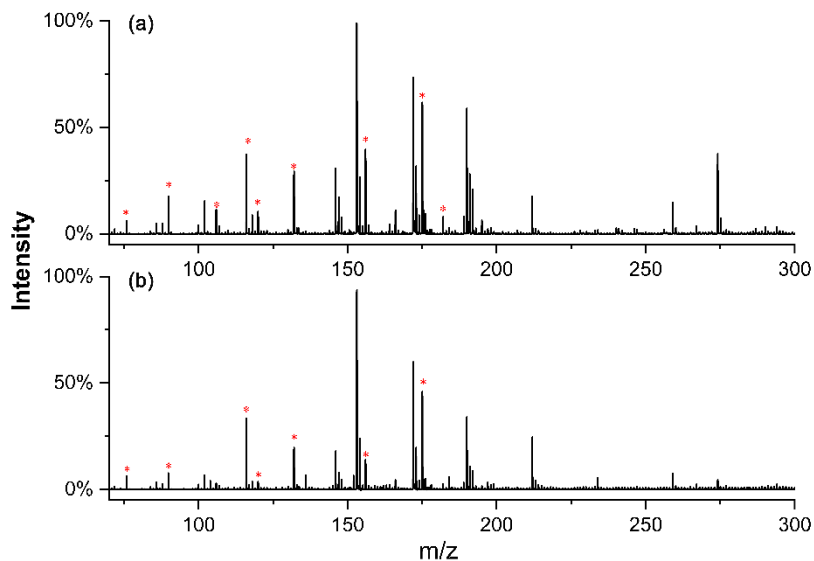

**Figure S19** LDI-MS spectra of (a) 16 amino acids standard solution and (b) gelatin extract solution with CHCA as matrix.

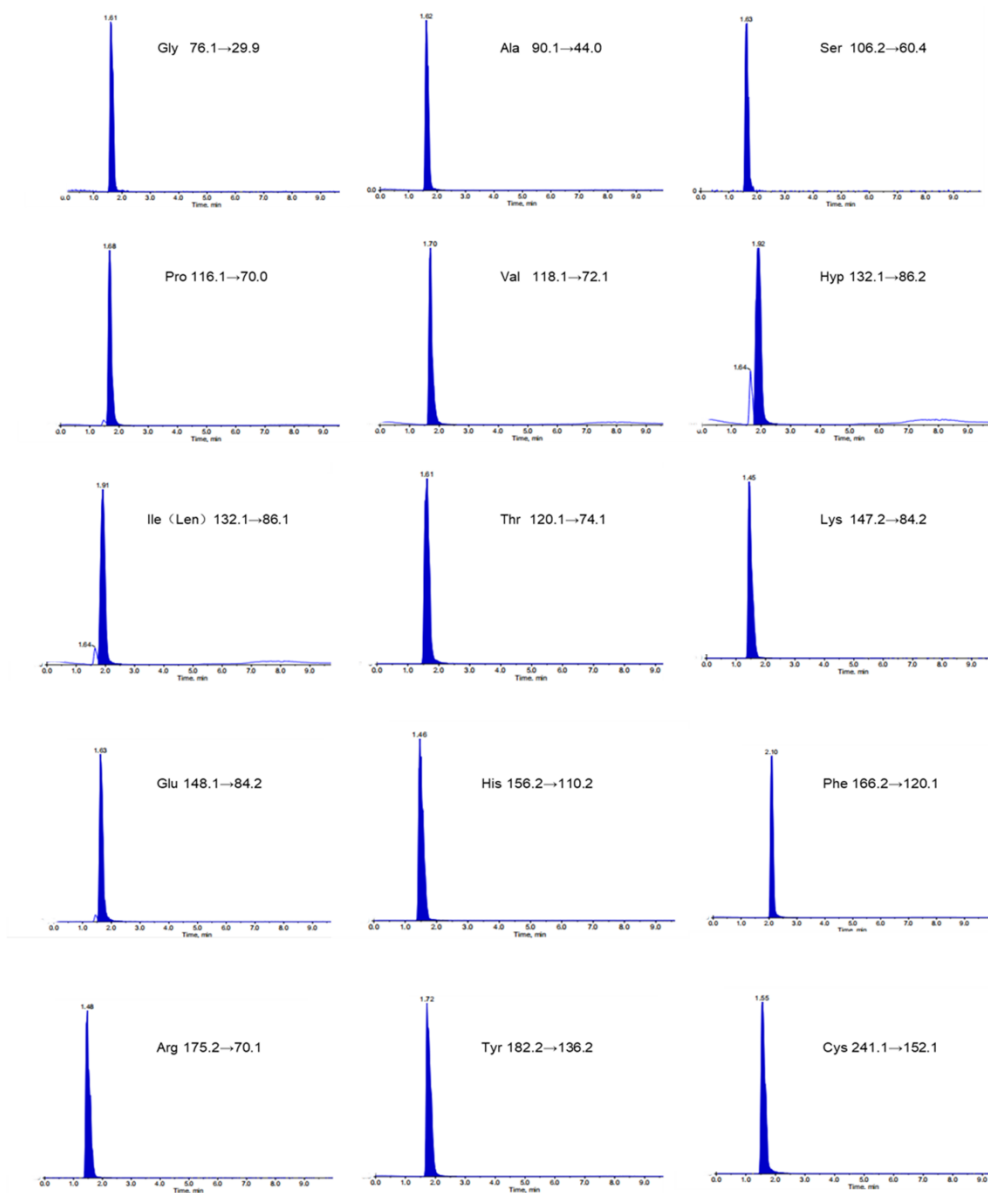

Figure S20 Typical MRM chromatograms of amino acids standard solutions.

Table S1 Structural parameters of nanospheres.

| Sample    | Average Size (nm) | PDI         | Zeta potential (mv) |
|-----------|-------------------|-------------|---------------------|
| Au@MSN    | 155.8±4.43 nm     | 0.199±0.134 | -10.31±1.032        |
| Au@MSN@Ag | 186.9±3.53 nm     | 0.208±0.116 | -20.57±1.365        |

\*Three independent synthetic materials, each group of parameters measured three times.

Table S2 Elemental mapping results of nanospheres.

| Sample    | Weight (%) |       |       | Atomic (%) |       |      |
|-----------|------------|-------|-------|------------|-------|------|
|           | O          | Si    | Ag    | O          | Si    | Ag   |
| Au@MSN    | 41.49      | 58.21 | 0     | 55.76      | 44.24 | 0    |
| Au@MSN@Ag | 24.36      | 46.86 | 28.78 | 44.03      | 48.25 | 7.72 |

\*Three independent synthetic materials, each group of parameters measured three times.

Table S3 Small molecules ( $m/z < 500$ ) detected by LDI MS using Au@MSN@Ag as matrix.

| Name              | Abbrev. | Molecular Formula                                                           | Molecular Weight | [M+Na] <sup>+</sup> | [M+K] <sup>+</sup> | [M+ <sup>107</sup> Ag] <sup>+</sup> | [M+ <sup>109</sup> Ag] <sup>+</sup> |
|-------------------|---------|-----------------------------------------------------------------------------|------------------|---------------------|--------------------|-------------------------------------|-------------------------------------|
| Glycine           | Gly     | C <sub>2</sub> H <sub>5</sub> NO <sub>2</sub>                               | 75.0             | 98.0                | 114.1              | 181.9                               | 183.9                               |
| Alanine           | Ala     | C <sub>3</sub> H <sub>7</sub> NO <sub>2</sub>                               | 89.0             | 112.0               | 128.1              | 196.0                               | 198.0                               |
| Serine            | Ser     | C <sub>3</sub> H <sub>7</sub> NO <sub>3</sub>                               | 105.0            | 128.0               | 144.1              | 211.9                               | 213.9                               |
| Proline           | Pro     | C <sub>5</sub> H <sub>9</sub> NO <sub>2</sub>                               | 115.1            | 138.1               | 154.2              | 222.0                               | 224.0                               |
| Valine            | Val     | C <sub>5</sub> H <sub>11</sub> NO <sub>2</sub>                              | 117.1            | 140.1               | 156.2              | 224.0                               | 226.0                               |
| Hydroxyproline    | Hyp     | C <sub>5</sub> H <sub>9</sub> NO <sub>3</sub>                               | 131.1            | 154.0               | 170.2              | 238.0                               | 240.0                               |
| Isoleucine        | Ile     | C <sub>6</sub> H <sub>13</sub> NO <sub>2</sub>                              | 131.1            | 154.1               | 170.2              | 238.0                               | 240.0                               |
| Leucine           | Leu     | C <sub>6</sub> H <sub>13</sub> NO <sub>2</sub>                              | 131.1            | 154.1               | 170.2              | 238.0                               | 240.0                               |
| Threonine         | Thr     | C <sub>4</sub> H <sub>9</sub> NO <sub>3</sub>                               | 119.1            | 142.0               | 158.2              | 226.0                               | 228.0                               |
| Lysine            | Lys     | C <sub>6</sub> H <sub>14</sub> N <sub>2</sub> O <sub>2</sub>                | 146.1            | 169.1               | 185.2              | 253.0                               | 255.0                               |
| Glutamic acid     | Glu     | C <sub>5</sub> H <sub>9</sub> NO <sub>4</sub>                               | 147.1            | 170.0               | 186.2              | 254.0                               | 256.0                               |
| Histidine         | His     | C <sub>6</sub> H <sub>9</sub> N <sub>3</sub> O <sub>2</sub>                 | 155.1            | 178.1               | 194.2              | 262.0                               | 264.0                               |
| Phenylalanine     | Phe     | C <sub>9</sub> H <sub>11</sub> NO <sub>2</sub>                              | 165.1            | 188.1               | 204.2              | 272.0                               | 274.0                               |
| Arginine          | Arg     | C <sub>6</sub> H <sub>14</sub> N <sub>4</sub> O <sub>2</sub>                | 174.1            | 197.1               | 213.2              | 281.0                               | 283.0                               |
| Tyrosine          | Tyr     | C <sub>9</sub> H <sub>11</sub> NO <sub>3</sub>                              | 181.1            | 204.1               | 220.2              | 288.0                               | 290.0                               |
| Cysteine          | Cys     | C <sub>6</sub> H <sub>12</sub> N <sub>2</sub> O <sub>4</sub> S <sub>2</sub> | 240.0            | 263.0               | 279.1              | 347.0                               | 349.0                               |
| Tryptophan        | Try     | C <sub>11</sub> H <sub>12</sub> N <sub>2</sub> O <sub>2</sub>               | 204.1            | 227.1               | 243.2              | 311.0                               | 313.0                               |
| Glucose           | Glu     | C <sub>6</sub> H <sub>12</sub> O <sub>6</sub>                               | 180.1            | 203.0               | 219.2              | 287.0                               | 289.0                               |
| Sucrose           | Suc     | C <sub>12</sub> H <sub>22</sub> O <sub>11</sub>                             | 342.1            | 365.1               | 381.2              | 449.0                               | 451.0                               |
| Ginkgolide A      | GA      | C <sub>20</sub> H <sub>24</sub> O <sub>9</sub>                              | 408.1            | 431.1               | 447.2              | 515.0                               | 517.0                               |
| Ginkgolide B      | GB      | C <sub>20</sub> H <sub>24</sub> O <sub>10</sub>                             | 424.1            | 447.1               | 463.2              | 531.0                               | 533.0                               |
| Ginkgolide C      | GC      | C <sub>20</sub> H <sub>24</sub> O <sub>11</sub>                             | 440.1            | 463.1               | 479.2              | 547.0                               | 549.0                               |
| Caffeine          | Caf     | C <sub>8</sub> H <sub>10</sub> N <sub>4</sub> O <sub>2</sub>                | 194.1            | 217.1               | 233.2              | 301.0                               | 303.0                               |
| Guanine           | Gua     | C <sub>5</sub> H <sub>5</sub> N <sub>5</sub> O                              | 151.0            | 174.0               | 190.1              | 258.0                               | 260.0                               |
| Inosine           | Ino     | C <sub>10</sub> H <sub>12</sub> N <sub>4</sub> O <sub>5</sub>               | 268.1            | 291.1               | 307.2              | 375.0                               | 377.0                               |
| Glutamine         | Gln     | C <sub>5</sub> H <sub>10</sub> N <sub>2</sub> O <sub>3</sub>                | 146.1            | 169.1               | 185.2              | 253.0                               | 255.0                               |
| Kaempferol        | Kae     | C <sub>15</sub> H <sub>10</sub> O <sub>6</sub>                              | 286.0            | 309.0               | 325.1              | 393.0                               | 395.0                               |
| Quercetin         | Que     | C <sub>15</sub> H <sub>10</sub> O <sub>7</sub>                              | 302.0            | 325.0               | 341.1              | 408.9                               | 410.9                               |
| Puerarin          | Pue     | C <sub>21</sub> H <sub>20</sub> O <sub>9</sub>                              | 416.1            | 439.1               | 455.2              | 523.0                               | 525.0                               |
| Lauric acid       | C12:0   | C <sub>12</sub> H <sub>24</sub> O <sub>2</sub>                              | 200.2            | 223.2               | 239.3              | 307.1                               | 309.1                               |
| Palmitic acid     | C16:0   | C <sub>16</sub> H <sub>32</sub> O <sub>2</sub>                              | 256.2            | 279.2               | 295.3              | 363.1                               | 365.1                               |
| Stearic acid      | C18:0   | C <sub>18</sub> H <sub>36</sub> O <sub>2</sub>                              | 284.3            | 307.3               | 323.4              | 391.2                               | 393.2                               |
| Arachidic acid    | C20:0   | C <sub>20</sub> H <sub>40</sub> O <sub>2</sub>                              | 312.3            | 335.3               | 351.4              | 419.2                               | 421.2                               |
| n-Docosanoic acid | C22:0   | C <sub>22</sub> H <sub>44</sub> O <sub>2</sub>                              | 340.3            | 363.3               | 379.4              | 447.2                               | 449.2                               |
| Resveratrol       | Res     | C <sub>14</sub> H <sub>12</sub> O <sub>3</sub>                              | 228.1            | 251.1               | 267.2              | 335.0                               | 337.0                               |

Table S4 Large molecules ( $m/z \approx 500-1300$ ) detected by LDI MS using Au@MSN@Ag as matrix.

| Name                      | Abbrev.             | Molecular Formula                                               | Molecular Weight | [M+Na] <sup>+</sup> | [M+K] <sup>+</sup> |
|---------------------------|---------------------|-----------------------------------------------------------------|------------------|---------------------|--------------------|
| Notoginsenoside R1        | R1                  | C <sub>47</sub> H <sub>80</sub> O <sub>18</sub>                 | 932.5            | 955.5               | 971.6              |
| Ginsenoside Rg1           | Rg1                 | C <sub>42</sub> H <sub>72</sub> O <sub>14</sub>                 | 800.5            | 823.5               | 839.6              |
| Ginsenoside Re            | Re                  | C <sub>48</sub> H <sub>82</sub> O <sub>18</sub>                 | 946.6            | 969.5               | 985.6              |
| Ginsenoside Rb1           | Rb1                 | C <sub>54</sub> H <sub>92</sub> O <sub>23</sub>                 | 1108.6           | 1131.6              | 1147.7             |
| Name                      | Amino Acid Sequence | Molecular Formula                                               | Molecular Weight | [M+Na] <sup>+</sup> | [M+K] <sup>+</sup> |
| Donkey derived peptide A1 | GPAGPTGPVKG         | C <sub>41</sub> H <sub>68</sub> N <sub>12</sub> O <sub>13</sub> | 936.5            | 959.5               | 975.6              |
| Donkey derived peptide A2 | GEAGAAGPAGPAGPR     | C <sub>51</sub> H <sub>82</sub> N <sub>18</sub> O <sub>18</sub> | 1234.6           | 1257.6              | 1273.7             |
| Horse derived peptide A   | GASGPAGVR           | C <sub>31</sub> H <sub>54</sub> N <sub>12</sub> O <sub>11</sub> | 770.4            | 793.4               | 809.5              |
| Bovine derived peptide A1 | GEAGPSGPAGPTGAR     | C <sub>52</sub> H <sub>84</sub> N <sub>18</sub> O <sub>20</sub> | 1280.6           | 1303.6              | 1319.7             |

Table S5 The relative content of saccharides in 2 kinds of medicinal *Dendrobium* (n=10,%)

| parameter                     | <i>Dendrobium huoshanense</i> | <i>Dendrobium candidum</i> |
|-------------------------------|-------------------------------|----------------------------|
| monosaccharides               | 0.68±0.06 <sup>a</sup>        | 0.97±0.07 <sup>b</sup>     |
| disaccharide                  | 2.71±0.16 <sup>a</sup>        | 0.91±0.04 <sup>b</sup>     |
| total                         | 3.38±0.22 <sup>a</sup>        | 1.18±0.09 <sup>b</sup>     |
| Monosaccharides/ disaccharide | 4.01±0.19 <sup>a</sup>        | 0.93±0.06 <sup>b</sup>     |

<sup>a,b</sup> Different letters in the same row indicate significant differences (P < 0.05) between the means.

Table S6 MS/MS parameters for amino acids analysis by HPLC-MS-MS.

| Name           | Abbrev. | Q1    | Q3    | DP (V) | CE (eV) |
|----------------|---------|-------|-------|--------|---------|
| Glycine        | Gly     | 76.1  | 29.9  | 60     | 15      |
| Alanine        | Ala     | 90.1  | 44.0  | 79     | 10      |
| Serine         | Ser     | 106.2 | 60.4  | 67     | 8       |
| Proline        | Pro     | 116.1 | 70.0  | 68     | 10      |
| Valine         | Val     | 118.1 | 72.1  | 54     | 10      |
| Hydroxyproline | Hyp     | 132.1 | 86.2  | 60     | 15      |
| Isoleucine     | Ile     | 132.1 | 86.1  | 64     | 10      |
| Leucine        | Leu     | 132.1 | 86.1  | 64     | 10      |
| Threonine      | Thr     | 120.1 | 74.1  | 93     | 20      |
| Lysine         | Lys     | 147.2 | 84.2  | 66     | 14      |
| Glutamic acid  | Glu     | 148.1 | 84.2  | 83     | 14      |
| Histidine      | His     | 156.2 | 110.2 | 95     | 16      |
| Phenylalanine  | Phe     | 166.2 | 120.1 | 56     | 14      |
| Arginine       | Arg     | 175.2 | 70.1  | 88     | 18      |
| Tyrosine       | Tyr     | 182.2 | 136.2 | 46     | 17      |
| Cysteine       | Cys     | 241.1 | 152.1 | 60     | 15      |

Table S7 Amino acid content of different hide gelatins detected by MALDI-MS and HPLC-MS-MS (n=5, %)<sup>a,c</sup>

| Amino Acids | Donkey-hide gelatin     |            | Bovine-hide gelatin     |            | Pig-hide gelatin        |            |
|-------------|-------------------------|------------|-------------------------|------------|-------------------------|------------|
|             | MALDI-MS                | HPLC-MS-MS | MALDI-MS                | HPLC-MS-MS | MALDI-MS                | HPLC-MS-MS |
| Gly         | 23.48±0.47              | 23.11±0.39 | 20.54±0.88              | 21.07±0.93 | 25.77±0.69              | 26.18±0.86 |
| Ala         | 7.79±0.86               | 7.81±0.23  | 6.95±0.23               | 7.18±0.14  | 7.58±0.37               | 7.97±0.30  |
| Ser         | 2.29±0.10               | 2.30±0.17  | 2.00±0.08               | 1.99±0.12  | 2.60±0.29               | 2.52±0.28  |
| Pro         | 12.78±0.43              | 13.12±0.35 | 10.74±0.59              | 10.20±0.83 | 13.93±0.58              | 13.40±0.49 |
| Val         | 2.30±0.13               | 2.44±0.13  | 1.99±0.10               | 2.06±0.11  | 1.75±0.15               | 1.85±0.13  |
| Hyp         | 15.92±0.25 <sup>b</sup> | 10.30±0.74 | 13.66±0.43 <sup>b</sup> | 8.74±0.37  | 12.10±0.87 <sup>b</sup> | 7.36±0.67  |
| Leu(Ile)    |                         | 5.15±0.41  |                         | 4.92±0.25  |                         | 4.64±0.27  |
| Thr         | 1.87±0.12               | 1.91±0.11  | 1.73±0.04               | 1.81±0.07  | 2.59±0.03               | 2.72±0.10  |
| Lys         | 3.21±0.07               | 3.13±0.06  | 3.00±0.07               | 2.78±0.07  | 3.41±0.12               | 3.63±0.16  |
| Glu         | 4.63±0.12               | 4.72±0.17  | 3.44±0.12               | 3.49±0.13  | 2.49±0.01               | 2.65±0.06  |
| His         | 1.19±0.07               | 1.21±0.10  | 1.07±0.05               | 1.11±0.03  | 1.40±0.10               | 1.48±0.05  |
| Phe         | 2.00±0.05               | 2.14±0.06  | 1.87±0.09               | 1.88±0.07  | 2.39±0.16               | 2.50±0.14  |
| Arg         | 3.12±0.13               | 3.01±0.13  | 3.00±0.12               | 3.12±0.12  | 3.49±0.03               | 3.63±0.05  |
| Tyr         | 0.94±0.10               | 0.98±0.09  | 0.75±0.04               | 0.77±0.07  | 0.84±0.04               | 0.85±0.06  |
| Total       | 81.54±0.43              | 81.33±1.23 | 70.75±1.14              | 71.12±1.27 | 80.37±1.03              | 81.38±1.33 |

<sup>a</sup> The result of amino acid content were no significant differences ( $P > 0.05$ ) between two detect methods.

<sup>b</sup> Total content of Hyp, Ile, and Leu.

<sup>c</sup> The results were calculated as dry samples.
